1 Title

2 Strategies for building computing skills to support microbiome analysis: a five-year perspective  
3 from the EDAMAME workshop

4

5 Authors

6 Ashley Shade\*<sup>a,b</sup>, Taylor K. Dunivin<sup>a</sup>, Jinlyung Choi<sup>c</sup>, Tracy K. Teal<sup>d</sup>, and Adina C. Howe<sup>c</sup>

7

8 <sup>a</sup>Department of Microbiology and Molecular Genetics, Michigan State University, East Lansing,  
9 MI 48824

10 <sup>b</sup> Department of Plant, Soil and Microbial Sciences, Michigan State University, East Lansing, MI  
11 48824 USA

12 <sup>c</sup> Department of Agricultural and Biosystems Engineering, Iowa State University, Ames, IA 50011  
13 USA

14 <sup>d</sup> Data Carpentry, Davis, CA USA

15

16 \*Correspondence, [shadeash@msu.edu](mailto:shadeash@msu.edu)

17

18 Abstract

19 Here, we report our educational approach and learner evaluations of the first five years of the  
20 Explorations in Data Analysis for Metagenomic Advances in Microbial Ecology (EDAMAME)  
21 workshop, held annually at Michigan State University's Kellogg Biological Station from 2014-  
22 2018. We hope this information will be useful for others who want to organize computing-  
23 intensive workshops and encourage quantitative skill development among microbiologists.

24

25 Importance

26 High-throughput sequencing and related statistical and bioinformatic analyses have become  
27 routine in microbiology in the past decade, but there are few formal training opportunities to  
28 develop these skills. A week-long workshop can offer sufficient time for novices to become  
29 introduced to best computing practices and common workflows in sequence analysis. We  
30 report our experiences in executing such a workshop targeted to professional learners  
31 (graduate students, post-doctoral scientists, faculty, and research staff).

32

33 Introduction

34 Over the last decade, two important advances have fostered a new era in biomedical  
35 and environmental research. First, it is now recognized that microbial communities  
36 (“microbiomes”) play essential roles for the health of the environments and the hosts that they  
37 inhabit. Second, advances in high-throughput sequencing technologies allow observations of  
38 the diversity and functional potential of microbiomes in their habitats (1), captured with  
39 spatially and temporally ambitious study designs (2). Together, these advances in knowledge  
40 and methodology deepen and broaden our understanding of the centrality of microbiomes for  
41 host and environmental health. Because of the economy and accessibility of high-throughput  
42 sequencing, researchers can now investigate the diversity of interesting microbiomes and can  
43 begin to untangle how this diversity contributes to host or ecosystem health. Efforts to  
44 capitalize on the promise of microbiome sequencing data have resulted in information-rich  
45 genomic datasets that must be analyzed to gain knowledge of their intricate relationships.

46           We realized that there was a need for broad computational training in microbiome  
47 analysis. In 2014, we were encouraged by Dr. C. Titus Brown (now at University of California-  
48 Davis) to offer a microbiome analysis workshop. At the time, he led the Analyzing Next-Gen  
49 Sequencing (ANGUS, <https://angus.readthedocs.io/en/2018/index.html>) Workshop at  
50 Michigan State University's Kellogg Biological Station (KBS). He noted that some ANGUS  
51 learners were particularly interested in microbiome analysis and that there were limited  
52 offerings for this training. At the time, there were several short-duration workshops focused on  
53 specific tools, such as QIIME(4) and mothur(5), as well as a broader, multi-week course,  
54 STAMPS (<https://www.mbl.edu/education/courses/stamps/>), at the Marine Biological  
55 Laboratory in Woods Hole, MA USA. There were few workshops that addressed the needs of  
56 learners who wanted more information than what could be covered in a day but also could not  
57 commit to spending several weeks away. Thus, we suspected that there was a need for broad  
58 and economical training in microbiome analysis, especially in the U.S. Midwest.

59           In response, we created a one-week intensive course to train biologists (from graduate  
60 students to faculty) in microbiome-associated sequencing analysis, from raw sequence handling  
61 and quality control to statistical analyses and experimental design. We named the course  
62 EDAMAME: Explorations in Data Analysis for Metagenomic Advances in Microbial Ecology.  
63 Ashley Shade, at the time a new assistant professor in microbial ecology at the Department of  
64 Microbiology and Molecular Genetics at Michigan State University, initiated the workshop and  
65 started its content development from her materials from a short workshop she offered while  
66 training in her post-doctoral advisor's lab. Tracy Teal was recruited and brought her array of  
67 experience and perspective as a leader in the Software and Data Carpentries workshops, which

68 provide general computing training. In the first year, J. Herr, a post-doc in Shannon Manning's  
69 lab at Michigan State who had Data Carpentry training, contributed to developing and  
70 implementing the original content. The instruction team expanded in 2016 to include Adina  
71 Howe, who was a new faculty at Iowa State and brought important expertise in untargeted  
72 metagenome analysis.

73 Here, we report a five-year perspective on the EDAMAME workshop. We present  
74 EDAMAME's learning objectives, target audience and admissions, instructional team, learning  
75 environment, educational strategy and assessment, and community resources. We discuss  
76 results from assessment, lessons learned and an outlook for future microbiome training.

77

78 Results

79 *EDAMAME learning objectives*

80 EDAMAME's learning objectives were tailored annually to incorporate learners'  
81 changing interests and changes in tools and technology (**Box 1**). As a consequence, we created  
82 and retired tutorials as demands changed. However, each year featured foundational tutorials  
83 in computing literacy, state-of-the-science tools for microbiome analyses, ecological statistics,  
84 and computing best practices.

85 *Target learners and admissions*

86 We targeted our applicant pool towards learners who would benefit most from the  
87 training and who we expected would share their developed expertise with others to maximize

88 the reach of the workshop's training. We accepted applicants who were novice in their analysis  
89 skillset and did not have apparent access to other resources to support their skill development.  
90 We also aimed to promote diversity in scientific discipline (e.g., human, agricultural,  
91 environmental), learner gender and background, research institution (e.g., undergraduate-  
92 serving, research university, agencies), geography (with special advertising to learners from the  
93 Midwest), and academic level (**Figure 1, Figure 2**). We also strove to provide opportunity to  
94 international learners and learners from underrepresented backgrounds. To advertise the  
95 course, we used social media (Twitter), our website, and professional networks. We also  
96 attempted to reach broader audiences by advertising with international scientific networks,  
97 especially Ciencia Puerto Rico in 2014 - 2016.

98 In each workshop, we could accommodate 23 - 26 learners in the classroom, and  
99 applications were oversubscribed every year (**Table 1**). As admissions became increasingly  
100 competitive, we began to require (rather than to encourage) that applicants had generated a  
101 microbiome dataset prior to the workshop. We found that students who had struggled in an  
102 analysis attempt were highly incentivized to maximize their time at the workshop. Also, they  
103 could work on their data during office hours and ask specific questions to the instructors and  
104 TAs.

#### 105 *Instructional team*

106 A large instructional team was necessary to support EDAMAME's learning goals. There  
107 were one to three lead instructors per year (**Table 1**). The instructors led the course, oversaw  
108 admissions, provided lectures and course content, determined guest lectures, and mentored

109 TAs in tutorial development. In the final two years of the workshop, there was also a course  
110 coordinator who oversaw conference logistics, fielded learner and applicant questions, and  
111 coordinated transportation for learners, guest lecturers, and instructors.

112         The hands-on nature of the workshop necessitated several dedicated TAs. Multiple  
113 instructors and supportive TAs in the classroom allowed us to be immediately responsive to the  
114 needs of the learners. TAs led tutorials based on interest and expertise. Having multiple TAs  
115 broadened instructional expertise and allowed unscheduled time for each TA to rest when they  
116 were not supporting instruction. Most often, new learners struggled with basic syntax and  
117 interpreting error messages. Novice TAs (e.g., early graduate students) helped learners trouble  
118 shoot common errors, while the more senior TAs and instructors assisted with more  
119 complicated hurdles (e.g., software and operating system incompatibilities, experimental  
120 design power for data analysis). In addition to instruction, TAs supported the logistical aspects  
121 of the course, such as local transportation for learners, purchasing supplies, and assisting  
122 learners with unexpected personal needs (e.g., trip to the medical center, forgotten  
123 toothbrush). TAs included volunteers (graduate students and post-docs) and graduate  
124 assistants partially supported by EDAMAME external funding. Participation in the workshop  
125 also offered TAs benefits to engage in teaching opportunities that served diverse audiences.

126         There were also several invited guest instructors who offered tutorials, technical  
127 lectures, and research talks (**Table 2**). Guest instructors varied according to guest availability,  
128 learner interests, and workshop duration, but some guest instructors generously provided  
129 content every year. Stuart Jones (University of Notre Dame) taught statistical analysis in R;

130 Patrick Schloss and members of his lab (University of Michigan) taught amplicon analysis with  
131 mothur; Jim Tiedje (Michigan State University) provided a lecture and discussion on the future  
132 of microbial ecology. Instructors interacted with the learners during dinner and social time, and  
133 this provided an opportunity for learner networking and discussions.

134

### 135 *Learning environment and daily schedule*

136 EDAMAME was held at the Kellogg Biological Station (KBS), which offered a remote  
137 location, offering an immersive experience for learners and instructors. KBS was also chosen for  
138 economy – the room and board rates at KBS were affordable to many (e.g., ~\$370 per week in  
139 2018). Teaching assistants and volunteers provided transportation from the Kalamazoo and  
140 Lansing airports to KBS. KBS also provided conference services, dining, wifi, and bonfires.  
141 Finally, the natural setting and outdoor activities at KBS provided a respite to time spent in  
142 front of the computer.

143 The length of the workshop varied from 7 - 11 days (**Table 1**), including travel days. The  
144 morning schedule included an overview lecture followed by hands-on tutorials and group  
145 learning activities. After lunch, we had an afternoon lecture and additional tutorials. We held  
146 optional office hours with “choose your own adventure” tutorials and/or lectures on learner-  
147 chosen topics during the afternoon break. For example, in 2018 we discussed exact sequence  
148 variant analysis. Learners could also ask specific questions about their own data during office  
149 hours. After dinner, we held an evening guest lecture in microbiome research. Evenings  
150 provided free time for networking and relaxation.

151

152 *EDAMAME educational strategy and assessment*

153 EDAMAME's educational strategy addressed two training needs. First, we offered  
154 general training in the fundamentals of introductory computing (*e.g.*, command line, scripting,  
155 cloud computing, bioinformatic workflows). This equipped participants with the basic skills  
156 needed to independently execute their analyses. We also offered specific training to overcome  
157 hurdles particular to microbial metagenomic data analysis and advised on best practices for  
158 microbiome analysis. To iteratively assess these strategies, we used a combination of  
159 summative and formative assessments to determine participant learning gains.

160 For the summative assessments, we worked with educational consultants to develop  
161 online, anonymous surveys and perform pre- and post-workshop assessments. These  
162 assessments evaluated student-reported learning gains and confidence in areas aligned with  
163 our learning objectives. The learners created a password to preserve their anonymity while  
164 allowing for linking the pre- and post-survey responses. To maximize response rate, we  
165 provided dedicated time in the classroom to complete the surveys. The pre-assessment survey  
166 was completed on the first full day, and the post-assessment survey was completed on the final  
167 day of the workshop. We updated the survey annually to reflect any new or changed learning  
168 objectives but maintained the structure to facilitate interannual comparisons. Results of the  
169 annual surveys guided the continued development of course materials and topics covered. In  
170 the early years of the workshop, we had consultants perform in-classroom observations and



171 provide feedback to the instructors. Ultimately, we compiled the five years of pre- and post-  
172 survey data and performed a longitudinal analysis.

173 In the pre- and post- surveys, learners were asked to indicate the extent to which they  
174 understood specific learning outcomes or skills covered in the course, with ratings (e.g. Strongly  
175 Disagree, Disagree, Agree, and Strongly Agree (**Table 3**)).

176 We also used “real-time” assessment during the workshop by replicating formative  
177 assessment strategies found to be effective in Software Carpentry workshops (8–10). Each  
178 participant was given a green (“I’m doing okay”) and a red (“I have a question”) sticky note to  
179 stick onto their open laptop during tutorials. This visual cue allowed instructors to quickly  
180 survey the classroom and determine learners’ comfort level, and to attend to any student who  
181 was struggling during tutorials. Furthermore, it allowed students to continue working through  
182 tutorials or troubleshooting without the need of raising their hand. We also employed “minute  
183 cards”. After each tutorial, students wrote what went well on the green sticky note and what  
184 could be improved on the red sticky note. Instructors and TAs read through notes during breaks  
185 to quickly identify gaps in understanding. This allowed us to identify gaps and make  
186 adjustments (e.g., in speed) in the subsequent instruction period.

187

### 188 *Building community resources and peer networks*

189 We were dedicated to promote a welcoming and supportive learning environment. We  
190 presented a code of conduct in the welcome lecture so that it was clear that any questionable

191 conduct was grounds for dismissal. We used the online “etherpad” for shared note taking to  
192 maximize engagement and inclusivity. We did our best to accommodate learners with families,  
193 providing private housing to families and learners with special requirements.

194 We aimed to build a peer learning community and to provide resources to support  
195 learners beyond the workshop. We offered an informal meet-and-greet on the arrival travel day  
196 and get-to-know-you lightning presentations after the first full day. These interactions allowed  
197 learners to identify peers with common research interests early in the workshop. We created a  
198 workshop website and public repository on GitHub so that learners (and outside parties) could  
199 access EDAMAME learning materials. Linked content included lectures, hands-on tutorials, and  
200 reference lists. These materials have been shared openly, with most content licensed CC-BY, so  
201 all course registrants and anyone else could have access. We also shared group email lists and  
202 encouraged social media outreach via Twitter and blogging. An EDAMAME meet-up was also  
203 held at the International Society for Microbial Ecology 2016 meeting in Montreal, CA.

#### 204 *Pre- and post-survey comparisons and qualitative interviews*

205 Ninety-seven percent of EDAMAME learners from 2014 to 2018 rated the workshop overall  
206 in the top evaluative categories, “good” to “very good.” (**Figure 3**). A comparison of pre- and  
207 post-assessment learner-reported learning gains and/or confidence with the major learning  
208 objectives of EDAMAME show gains in all sub-categories of learning reported (**Figure 4**). There  
209 were largest gains between the pre- and post-assessments with Computational Understanding  
210 (**Figure 4B**) and Perception in Ability (**Figure 4C**).

211 We also asked short-answer questions at the end of the survey, in which learners were  
212 asked to design an experiment and report how they would process and analyze microbial  
213 community high-throughput sequencing data. We observed increased sophistication in the  
214 responses to the short-answer questions from the pre- to post-survey, with some learners  
215 leaving the questions blank in the pre- survey and then providing thorough answers in the post-  
216 survey. This suggests large gains especially for learners who were new to high-throughput  
217 sequence analysis.

218 Qualitative interviews from 9 learners who attended EDAMAME from 2014-2016 (each  
219 spending 25-40 minutes with the interviewer, **Table 4**) suggested that this group of learners  
220 were largely satisfied with the workshop and appreciated the attentiveness of the TAs and  
221 instructors as well as the red/green sticky note mechanism for soliciting help in real time.  
222 However, some of these learners also felt that there was too much material covered in the  
223 workshop and reported that they struggled to keep up with the pace of the course (“Content  
224 overwhelm”). Finally, we had many interviewed learners state that the workshop and materials  
225 covered made a positive impact on their career and research.

## 226 Discussion and Lessons Learned

227 We offer suggestions from our experiences for running an effective microbiome analysis  
228 workshop (**Box 2**). EDAMAME’s content changed from 2014 to 2018 to meet changing learner  
229 needs. These changes were guided in part by the applicants’ responses to questions about  
230 their dataset and their expectations for the workshop. For example, amplicon analysis (e.g., 16S  
231 rRNA gene sequencing) was favored in early years while untargeted metagenome analysis was

232 favored in later years. Similarly, proportionally fewer students in 2018 were novice to the  
233 command line or R, but the majority of the class appreciated the refresher. Some of the  
234 learners with self-taught experience embraced the opportunity to re-learn the “correct”  
235 approaches and to gain missing foundational knowledge. Several tutorials were popular every  
236 year. For example, there was a consistent demand for ecological statistics and “supporting”  
237 skills like GitHub/version control, and cloud computing.

238 High instructor to learner ratio was essential for the success of the hands-on EDAMAME  
239 workshop. In the years that we had the lowest instructor to learner ratios (e.g., in 2014 and  
240 2015, **Table 2**), the TAs and instructors anecdotally reported exhaustion while the learners  
241 craved more attention. In addition to formal instructors, learners could assist one another. To  
242 facilitate peer learning, we arranged the classroom in tables with groups of two or four. We  
243 also encouraged learners to support one another with troubleshooting in the time that it would  
244 take for a free instructor to come to assist

245 Regardless of the length of the course, several learners indicated in their post-assessments  
246 that more time at the workshop was needed each year. However, learners who were faculty or  
247 staff researchers shared (in informal conversations) that they would have been unable to  
248 commit to a longer workshop due to other professional responsibilities. We noted that there  
249 were other offerings for multi-week workshops (e.g., STAMPS), as well as several one- or two-  
250 day workshops at professional society meetings and pipeline-specific training (e.g., mothur and  
251 QIIME).

252       Timing the workshop had several challenges. EDAMAME was held in the summer, and we  
253       tried to avoid scheduling it for the same week as major microbiology conferences, like the  
254       American Society for Microbiology Microbe meeting, the International Symposium on Microbial  
255       Ecology (ISME) and Ecological Society of America meetings. Because microbiome analysis spans  
256       multiple disciplines, it was hard to avoid all of the large conferences that microbiome  
257       researchers may attend. We also had to change the timing workshop every year to  
258       accommodate the KBS event schedule. As EDAMAME grew in popularity, some learners applied  
259       for fellowships or travel awards to support their training, but the annual change in timing made  
260       it difficult for students to plan. Moving the workshop to a dedicated conference site (e.g., a  
261       hotel) may help with consistent timing, but it would also increase the cost to learners.

262       We found that using cloud computing streamlined course content and democratized access.  
263       We used the Amazon Elastic Compute Cloud (EC2), which was cost effective and available to  
264       students who do not have access to high performance computers at their home institutions. In  
265       early years, we guided learners through software installation on the EC2, but in later years, we  
266       installed software in advance to focus on moving data to and from the EC2. Using the EC2  
267       presented a challenge for learners who were affiliated with government agencies or research  
268       laboratories (e.g., US Environmental Protection Agency , US Geological Survey) because of their  
269       need for additional security and management approval prior to installing new software or  
270       moving data. While we did not have a perfect solution for these learners, we began to  
271       anticipate their needs and prompted them in advance to receive required permissions.  
272       Another hurdle with using the EC2 was the changing way that Amazon provided student or  
273       educational computing resources over the years. In some years, Amazon provided individual

274 credits to learners and in others required the instructors to apply for an educational grant.  
275 Cloud computing logistics needed to be anticipated about nine months in advance, but in years  
276 where individual email addresses were needed, it was impossible to prepare until after  
277 admissions were finalized, which typically occurred 4 - 6 months in advance of the workshop.  
278 We also note an issue for some international learners who did not have credit cards compatible  
279 with Amazon requirements to enroll for an EC2 account, and for these learners we had to share  
280 our own accounts or create accounts for them.

281 While our applicant pool and learner demographics reflected balance in gender, discipline,  
282 and academic level, EDAMAME fell short of its racial diversity goals. We could have benefitted  
283 from improvement in advertising the course to reach a broader pool to attract more applicants  
284 of color. We largely advertised on social media and through word of mouth. We recommended  
285 to specifically advertise to key target learner groups, like those underrepresented in the  
286 sciences who may be expected to have less access to the training. On a positive note, we have  
287 evidence that EDAMAME was reaching socioeconomic diversity goals, as two interview  
288 respondents were clear that they would not have had the same opportunity for training and  
289 advancement given their lower income backgrounds if it had not been for EDAMAME.

290 A final lesson to share is the balance between course value and learner costs. In its first  
291 years, EDAMAME was funded piece-meal by generous sponsors. We experimented with a  
292 mixed enrollment model of offering EDAMAME for university credit to local students and for  
293 fee to outside students, but many of the local students could not afford the summer tuition  
294 required for the credit hours. Then, EDAMAME was funded by external federal grants. We

295 began to charge modest workshop fees (\$325) to support items that could not be covered by  
296 the grant (e.g., coffee, snacks). As soon as we began to charge workshop fees, the majority of  
297 applicants began to request financial aid. We realized that many of the learners, mostly  
298 graduate students and post-doc, were paying for the workshop personally, so we then worked  
299 to waive fees for eligible students in need and offer scholarships for students with international  
300 travel. By contrast, the instructional team did not have enough funds to fully pay the TAs and  
301 instructors, who largely volunteered their time because they believed in the mission of the  
302 training. Guest instructors and lecturers generously volunteered their time as part of their  
303 broader impacts, and the workshop covered their travel expenses along with room and board  
304 at KBS. Thus, there is inevitable tension balancing instructor compensation and course  
305 affordability.

306       How much does it actually cost to run a workshop like EDAMAME? The first year, we ran  
307 the workshop for less than \$14,000; students paid their own expenses of room and board; and  
308 no workshop fees were charged. This face amount did not include substantial additional  
309 support that was provided via shared logistics with the ANGUS workshop, which was occurring  
310 at the same time at Kellogg Biological Station. It also did not include any support for personnel,  
311 which was the largest true expense. Ideally, there would have been an annual budget for  
312 instructor and TA summer salaries, a logistics coordinator salary, and hourly salary for  
313 undergraduate labor during the course. We also realized that unless we could procure funds to  
314 support personnel, the training may not be valued as highly by institutions and peers, and may  
315 instead be perceived as a cost to other scholarly activities. We were grateful for the support of  
316 the NIH 2015-2018 and the USDA 2017-2018. The second biggest expense was be financial aid

317 to offset costs of room and board and workshop fees to learners who needed it, which we  
318 provided in 2017 and 2018 to qualified learners, with USDA support. The third biggest expense  
319 was the educational consultant to evaluate the course as a neutral third-party, which was  
320 \$5,500 to \$6,000 per evaluation. The remaining expenses were conference services at Kellogg  
321 Biological Station, and lodging and travel expenses for the instructional team and guest  
322 speakers. In summary, there is a trade-off between the course cost, inclusive of the real value  
323 of instructor/TA time, and workshop affordability for the learners.

324

325 Future directions

326 While the data indicate that EDAMAME workshop was effective, a limited number of  
327 learners can be accommodated per year, and there is high effort from the instructional team to  
328 support them. This is a low-throughput model of skill development. We are eager to reach a  
329 larger learner pool than what we could accommodate in the classroom. In 2016, we  
330 experimented with live engagement of three to five remote learners (varied by tutorial) using  
331 free conference calling and screen sharing resources. The remote learners participated as a  
332 group at the same location. They engaged with the lectures and tutorials as fully as possible  
333 (but missed out on the guest lectures and other events). This added a mild distraction for the  
334 on-site learners, but the workshop proceeded relatively smoothly. The biggest hurdle was  
335 engaging with the remote learners during tutorials, as they had no classroom support. It is  
336 possible that a remote learning workshop could be successful, given an appropriate investment



337 into conference technology, an on-site coordinated dedicated to its logistics, and an enhanced  
338 instructional team with traveling TAs dedicated to the remote classrooms.

339 The content of EDAMAME remains freely available online, but parts of the content are also  
340 being transitioned to local offerings. Many universities desire more offerings of online or  
341 digitized curriculum, and there is a question of how to balance the university's need to provide  
342 quality instruction for tuition with the open-science philosophy of providing free, democratic  
343 access to information. At Michigan State University, we are developing a graduate-level  
344 learning module on microbial metagenomics that includes amplicon and untargeted  
345 metagenome analysis pipelines. The 1-credit metagenomics module includes hands-on  
346 tutorials, is offered twice a week for one month and is accompanied by pre-recorded lectures.  
347 Post-doctoral trainees or faculty can enroll for a modest fee. Those based on EDAMAME  
348 materials, the modular content at Michigan State covers less content because there are  
349 prerequisite modules required for enrollment. Learners already have familiarity with the  
350 command line, with submitting jobs to the high-performance computing cluster, and with  
351 fundamentals of microbial genome analysis. EDAMAME materials have also been expanded to  
352 teach international workshops including, a metagenomics one-day crash course in Rio, Brazil  
353 and a one-week microbiome analysis workshop at Centro de Investigaciones Biológicas del  
354 Noroeste in La Paz, Mexico. In addition, more general tutorials (e.g., shell, GitHub, etc) remain  
355 available from other efforts, including Software and Data Carpentry, and short format 2-day  
356 workshops are available at scale through The Carpentries (<http://carpentries.org>) on these  
357 skills.

358 Finally, we seek to maximize the impact of EDAMAME by offering this kind of training to  
359 those who need it most. We hope that the impact of our trainees training others is a lasting  
360 legacy of EDAMAME. We have found that our international learners have benefited immensely  
361 from this course, as they are challenged by access to compute resources or training. Going  
362 forward, we hope to continue to identify target audiences who could both benefit from our  
363 training and extend its impact broadly. Additionally, sequence analysis will continue to evolve  
364 with technologies, impacting the depth and breadth of scientific questions and experiments  
365 that are imaginable. We hope that our course content can continue to remove obstacles for  
366 scientists who wish to engage in these technologies.

367

## 368 Materials and Methods

369 This research was exempt under IRB ID# i052533 (standard educational practices), as  
370 reviewed by the Michigan State University Biomedical, Health Sciences Institutional Review  
371 Board (BIRB) and Social Science, Behavioral, Education Institutional Review Board (SIRB).

372 Data analysis for the pre- and post-survey assessment and associated reports were  
373 generated by an outside research consultants. Final reports for the years 2016, 2017 and 2018,  
374 were written by Beth M. Duckles, PhD of Insightful, LLC and for years 2014 and 2015, reports  
375 were written by Julie Libarkin of STEM ED. LLC. Code is available at  
376 [<https://github.com/ShadeLab/EDAMAMESurveys>]. Beth M. Duckles of Insightful also  
377 conducted qualitative interviews and provided final demographic summaries.

378

## 379 Acknowledgements

380 We thank C. Titus Brown for encouraging us to get EDAMAME started and for sharing ANGUS  
381 resources to support our launch. We are indebted to our EDAMAME guest speakers and  
382 instructors. We express immense gratitude to every single one of our TAs for their time,  
383 enthusiasm, and commitment to EDAMAME training. We thank the EDAMAME learners for  
384 their eager participation, humor, and patience. We also thank the Ribosomal Database Project  
385 and Institute for Cyber-Enabled Research at Michigan State for sharing their talents and  
386 resources.

387

## 388 Funding

389 This material is based upon work supported by the National Institute Of General Medical  
390 Sciences of the National Institutes of Health under Award Number R25GM115335; the National  
391 Science Foundation under Grant No DEB#1749544; AFRI food safety grant no. 2016-68003-  
392 24604 from the USDA National Institute of Food and Agriculture; the National Science  
393 Foundation under Cooperative Agreement No. DBI-0939454; Michigan State University through  
394 computational resources provided by the Institute for Cyber-Enabled Research; and the  
395 Amazon Web Services (AWS) Programs for Research and Education. Any opinions, findings, and  
396 conclusions or recommendations expressed in this material are those of the authors and do not  
397 necessarily reflect the views of these funding agencies.

398

## 399 Conflict of Interest

400 Amazon EC2 provided compute resources to EDAMAME students. In 2014, Illumina provided  
401 pizza dinner and in 2014-2017 MO BIO provided t-shirts and blogging opportunities on their  
402 company's blog.

403

#### 404 References

- 405 1. **Quince C, Walker AW, Simpson JT, Loman NJ, Segata N.** 2017. Shotgun metagenomics,  
406 from sampling to analysis. *Nat Biotechnol.*
- 407 2. **Knight R, Jansson J, Field D, Fierer N, Desai N, Fuhrman JA, Hugenholtz P, van der Lelie**  
408 **D, Meyer F, Stevens R, Bailey MJ, Gordon JI, Kowalchuk G a, Gilbert J a.** 2012. Unlocking  
409 the potential of metagenomics through replicated experimental design. *Nat Biotechnol*  
410 **30:513–520.**
- 411 3. **Shade A, Teal TKTKTK.** 2015. Computing Workflows for Biologists: A Roadmap. *PLoS Biol*  
412 **13.**
- 413 4. **Caporaso JG, Kuczynski J, Stombaugh J, Bittinger K, Bushman FD, Costello EK, Fierer N,**  
414 **Peña AG, Goodrich JK, Gordon JI, Huttley G a, Kelley ST, Knights D, Koenig JE, Ley RE,**  
415 **Lozupone C a, Mcdonald D, Muegge BD, Pirrung M, Reeder J, Sevinsky JR, Turnbaugh**  
416 **PJ, Walters W a, Widmann J, Yatsunencko T, Zaneveld J, Knight R.** 2010. QIIME allows  
417 analysis of high- throughput community sequencing data Intensity. *Nat Publ Gr* **7:335–**  
418 **336.**
- 419 5. **Schloss PD, Westcott SL, Ryabin T, Hall JR, Hartmann M, Hollister EB, Lesniewski RA,**  
420 **Oakley BB, Parks DH, Robinson CJ.** 2009. Introducing mothur: open-source, platform-  
421 independent, community-supported software for describing and comparing microbial

- 422 communities. *Appl Environ Microbiol* **75**:7537–7541.
- 423 6. **McDonald D, Clemente JC, Kuczynski J, Rideout J, Stombaugh J, Wendel D, Wilke A,**  
424 **Huse S, Hufnagle J, Meyer F, Knight R, Caporaso J.** 2012. The Biological Observation  
425 Matrix (BIOM) format or: how I learned to stop worrying and love the ome-ome.  
426 *Gigascience*.
- 427 7. **Team RDC, R Core Team.** 2013. R: A language and environment for statistical computing.  
428 R Foundation for Statistical Computing, Vienna, Austria, Austria.
- 429 8. **Teal TK, Cranston K a., Lapp H, White E, Wilson G, Ram K, Pawlik A.** 2015. Data  
430 Carpentry: Workshops to Increase Data Literacy for Researchers. *Int J Digit Curation*  
431 **10**:135–143.
- 432 9. **Wilson G.** 2006. Software carpentry: Getting scientists to write better code by making  
433 them more productive. *Comput Sci Eng*.
- 434 10. **Wilson G, Bryan J, Cranston K, Kitzes J, Nederbrag L, Teal TK.** 2017. Good enough  
435 practices in scientific computing. *PLoS Comput Biol* **13**:e1005510.
- 436
- 437

438 **Figure legends**

439 Figure 1. Distributions of EDAMAME learner gender and age, 2014-2018.

440 Figure 2. Distributions of EDAMAME learner ethnicity and academic status, 2014-2018.

441 Figure 3. Overall EDAMAME assessment 2014-2018.

442

443 Figure 4. Summarized comparison of self-reported learning gains between pre- and post-  
444 workshop assessments, aggregated over 2014-2018. (A) Comfort with computational tasks; (B)  
445 Computational Understanding;(C ) Perception in Computing Ability; and (D) Coding Ability.

446

447

448 Tables

449 **Table 1. Summary of EDAMAME dates, instructional staff, applicants, and learners from**  
450 **2014-2018.**

| Year | Dates                  | No. Days | No. TAs        | No. Instructors | No. applicants | No. workshop learners <sup>1</sup> |
|------|------------------------|----------|----------------|-----------------|----------------|------------------------------------|
| 2014 | 22 June to 29 June     | 8        | 1              | 3               | 50             | 23                                 |
| 2015 | 21 June to 01 July     | 11       | 6 <sup>2</sup> | 1               | 93             | 32 <sup>3</sup>                    |
| 2016 | 10 July to 20 July     | 11       | 6              | 3               | 62             | 25                                 |
| 2017 | 06 August to 12 August | 7        | 7              | 3               | 63             | 26                                 |
| 2018 | 24 June to 30 June     | 7        | 10             | 2               | 103            | 26                                 |

451 <sup>1</sup>No. workshop learners are from pre- and post- survey responses. Additional local learners  
452 participated *ad hoc* and may not have completed surveys.<sup>2</sup> There were two guest TAs in 2015  
453 who participated only in one tutorial each, with the remaining 4 TAs available throughout the  
454 workshop. <sup>3</sup>2016 participant data included 3 remote learners who participated in select  
455 tutorials.

456

457 **Table 2. Guest lecturers and instructors for EDAMAME.**

| Year        | Guests                                                                                                                                                                                                                                                                                                                                                                                                                                                                                                                      |
|-------------|-----------------------------------------------------------------------------------------------------------------------------------------------------------------------------------------------------------------------------------------------------------------------------------------------------------------------------------------------------------------------------------------------------------------------------------------------------------------------------------------------------------------------------|
| <b>2014</b> | <p>C. Titus Brown (then at Michigan State University; now University of California–Davis)</p> <p>Jack Gilbert (University of Chicago)</p> <p>Pat Schloss (University of Michigan)</p> <p>Jim Tiedje (Michigan State)</p> <p>Sebastian Boisvert (Argonne National Laboratory)</p> <p>Stuart Jones (University of Notre Dame)</p> <p>Jay Lennon (Indiana University)</p> <p>Adina Howe (Michigan State University)</p> <p>Kathryn Docherty (Western Michigan University)</p> <p>Ariane Peralta (East Carolina University)</p> |
| <b>2015</b> | <p>Vince Young (University of Michigan)</p> <p>Pat Schloss lab members (University of Michigan)</p> <p>Ariane Peralta (East Carolina University)</p> <p>Jay Lennon (Indiana University)</p> <p>Stuart Jones (University of Notre Dame)</p> <p>Jim Tiedje (Michigan State)</p> <p>Jim Cole (Michigan State)</p> <p>Qiong Wang (Michigan State)</p> <p>Matt Scholz (Michigan State)</p> <p>Sarah Evans (Kellogg Biological Station)</p>                                                                                       |



|             |                                                                                                                                                                                                                                                                             |
|-------------|-----------------------------------------------------------------------------------------------------------------------------------------------------------------------------------------------------------------------------------------------------------------------------|
|             | Vincent Deneff (University of Michigan)                                                                                                                                                                                                                                     |
| <b>2016</b> | Sarah Evans (Kellogg Biological Station)<br>Pat Schloss (University of Michigan)<br>Stuart Jones (University of Notre Dame)<br>Jim Tiedje (Michigan State)<br>Jim Cole (Michigan State)<br>Rich Lenski (Michigan State University)<br>Pat Bills (Michigan State University) |
| <b>2017</b> | Stuart Jones (University of Notre Dame)<br>Pat Schloss (University of Michigan)<br>Jim Tiedje (Michigan State University)<br>Heather Allen (USDA, Ames Iowa)                                                                                                                |
| <b>2018</b> | Patrick Schloss (University of Michigan)<br>Stuart Jones (University of Notre Dame)<br>Tomas Vetrovsky (Czech Academy of Sciences)<br>Thea Whitman (University of Wisconsin)<br>Jim Tiedje (Michigan State University)                                                      |

458

459

460 **Table 3. Representative survey questions for the “Computational Understanding” scale.**

|                                                                           |
|---------------------------------------------------------------------------|
|                                                                           |
| I know how to process Illumina data                                       |
| I understand what per_library_stats.py does                               |
| I know how to run R                                                       |
| I know the main differences in analyses offered by QIIME(4) and mothur(5) |
| I am familiar with .biom(6) formatted files                               |
| I can name at least two different microbial metagenomic databases         |
| I know what an R package(7) is                                            |
| I understand the structure of an OTU table                                |
| I know what a kmer is                                                     |
| I know the difference between alpha and beta diversity                    |
| I know how to visualize microbial metagenomic data                        |
| I know how to use metadata to guide community analyses                    |
| I know how to assemble shotgun metagenomic data                           |

461

462

463 **Table 4. Representative comments from interviews.** The sample is small at nine attendees, but each interviewee spent somewhere  
 464 between 25 and 40 minutes discussing their experience at the workshop, its impact on their professional life and walking through  
 465 the agenda for their year’s workshop to give detailed feedback. While it is a small sample, each person contributed a lot of  
 466 information. There were two respondents for 2014, four for 2015 and three for 2016. Each quote is labeled with the year the  
 467 respondent participated in the workshop  
 468

|                            |                                                                                                                                                                                                                                                                                                                                                                                                                                                                                                                                                         |
|----------------------------|---------------------------------------------------------------------------------------------------------------------------------------------------------------------------------------------------------------------------------------------------------------------------------------------------------------------------------------------------------------------------------------------------------------------------------------------------------------------------------------------------------------------------------------------------------|
| Positive overall comments  | <p>“EDAMAME was an inspiring introduction into microbiology. I thought the kind of analyses you could do with microbiology was really interesting. I really got pulled in on the data science part.” (2014)</p> <p>“It was definitely one of the most effective workshops I’ve been to.” (2016)</p> <p>“Very comprehensive, reached a lot of people from different backgrounds who were interested in analyzing microbial communities. I thought it provided a good survey of the tools that were available and it brought in some experts.” (2014)</p> |
| Content overwhelm comments | <p>“I loved it, I had a blast. It was exhausting. It was a lot of fun, I learned a lot. I kind of felt overwhelmed.” (2016)</p> <p>“I appreciated the workshop for its usefulness, it’s a lot to take in. We need time to process. It’s nice to have a bit of a breather. For someone who was new to the field like me. I needed a bit of time to digest.” (2014)</p> <p>“It was pretty intense for me. I had never done any kind of code work before. This was really my first introduction...” (2015)</p>                                             |
| Career Impact Comments     | <p>“I can say that the course inspired me and put me on my path and inspired me to think about different ways to do analysis. They talked a lot about the different tools that were available.” (2014)</p>                                                                                                                                                                                                                                                                                                                                              |

|  |                                                                                                                                                                                                                                                                                                                                                                                                                                                                             |
|--|-----------------------------------------------------------------------------------------------------------------------------------------------------------------------------------------------------------------------------------------------------------------------------------------------------------------------------------------------------------------------------------------------------------------------------------------------------------------------------|
|  | <p>“It was a great workshop. It really helped me in my career path. It’s opened a door for me to get into bioinformatics.” (2015)</p> <p>“It really propelled my graduate school career and has pushed me... I took away the basic tools and I’ve been able to grow from that... I know how to make a pipeline. I know the basic structure and they gave that to me.” (2015)</p> <p>“I’m one of the few people at [my workplace] who can analyze sequence data.” (2016)</p> |
|--|-----------------------------------------------------------------------------------------------------------------------------------------------------------------------------------------------------------------------------------------------------------------------------------------------------------------------------------------------------------------------------------------------------------------------------------------------------------------------------|

469

470

471 **Box 1. Overview of learning objectives for the EDAMAME workshop.**

- 472 ● Develop working proficiency at the command line and with shell.
- 473 ● Explain the process of high-throughput sequencing, provide an overview of data-  
474 handling (quality control, pre-treatment), and discuss their biases.
- 475 ● Access computing resources: Transfer data and run analyses on Amazon EC2 and/or a  
476 high-performance computing cluster.
- 477 ● Access and/or create version-controlled code and resources on GitHub.
- 478 ● Discuss steps in the ecological analyses of microbiomes, including alpha and beta-  
479 diversity, ordinations, and resemblance metrics.
- 480 ● Explore datasets and statistically test hypotheses in R.
- 481 ● Visualize patterns in microbial communities using R.
- 482 ● Develop a working proficiency with amplicon sequencing workflows and tools (e.g.,  
483 QIIME, or mothur, or usearch; (3).
- 484 ● Develop a working proficiency with shotgun metagenomics workflows.
- 485 ● Become familiar with publicly accessible microbial sequence databases/repositories  
486 (e.g., NCBI, MG-RAST, FunGene) and the tools that they offer for deposition and  
487 analyses.
- 488 ● Identify resources for troubleshooting. This includes: how to ask for and where to find  
489 general help online, through peer networks, and from workflow-specific resources (e.g.,  
490 public tutorials and wikis).

491

492

493 **Box 2: Lessons Learned**

- 494 1. Regularly evaluate and change content to meet changing learner needs.
- 495 2. Maintain a high instructor to learner ratio.
- 496 3. Provide consistent workshop timing and fill the “middle-ground” duration needs of  
497 learners.
- 498 4. Understand the pros and cons of cloud computing for a workshop, and plan use of these  
499 resources well in advance.
- 500 5. Reach the broadest applicant pool of learners who have the potential to have the most  
501 gains from the training.
- 502 6. Consider the trade-off in workshop value (including instructor time) and maintaining  
503 economical costs to learners.
- 504 7. Plan well in advance to achieve best outcomes for applicants who require a US VISA and  
505 international travel plans to attend the workshop.
- 506 8. Almost all learning engagement needs to happen on-site; efforts to engage learners pre-  
507 workshop were ineffective.
- 508 9. Scheduled classes should teach to the majority of learners to accomplish all our learning  
509 objectives. Office hours can help struggling learners catch up.
- 510 10. A welcoming and inclusive environment creates a positive workshop experience and is  
511 essential for effective learning.
- .....

## Attendee Gender

## Attendee Age

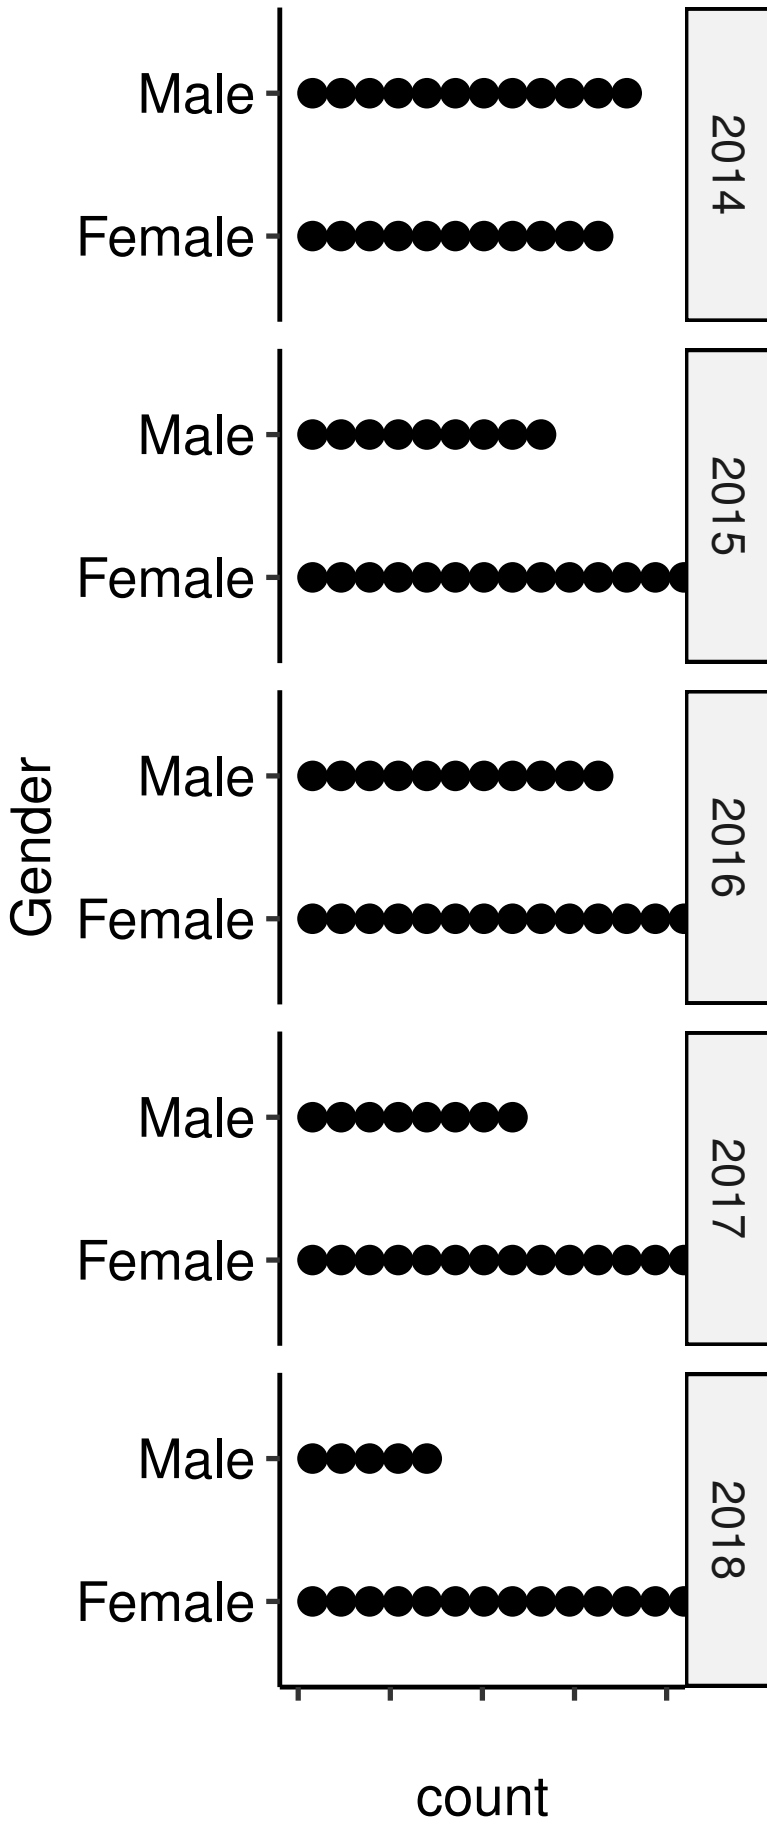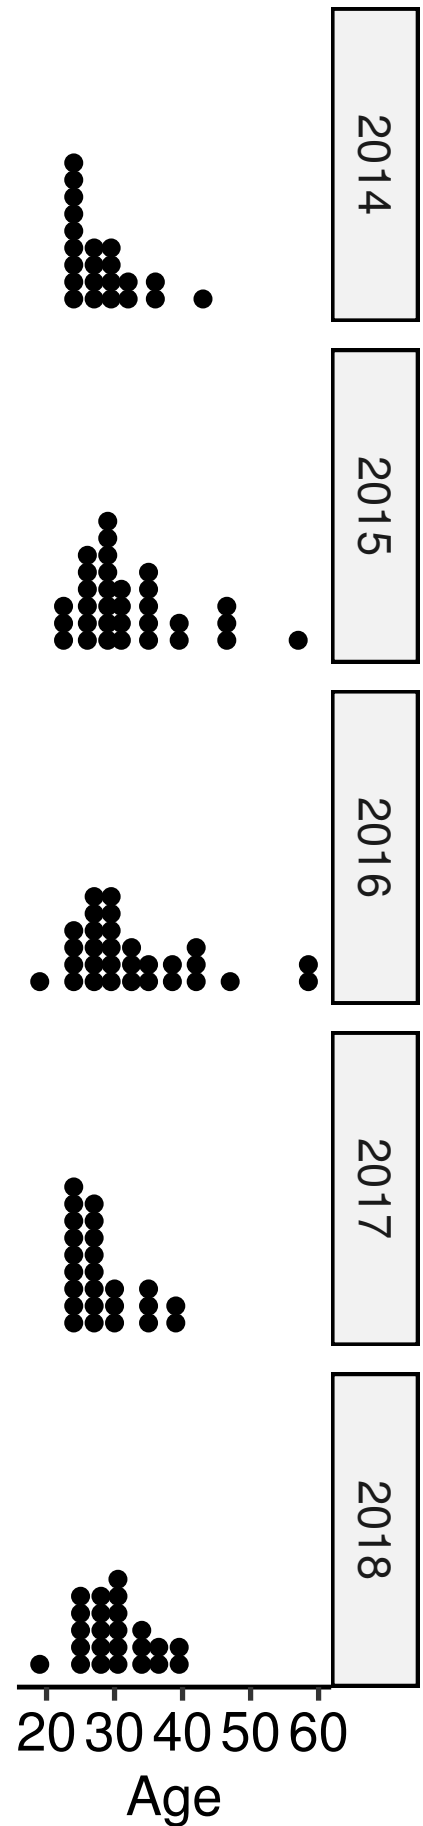

### Attendee Ethnicity

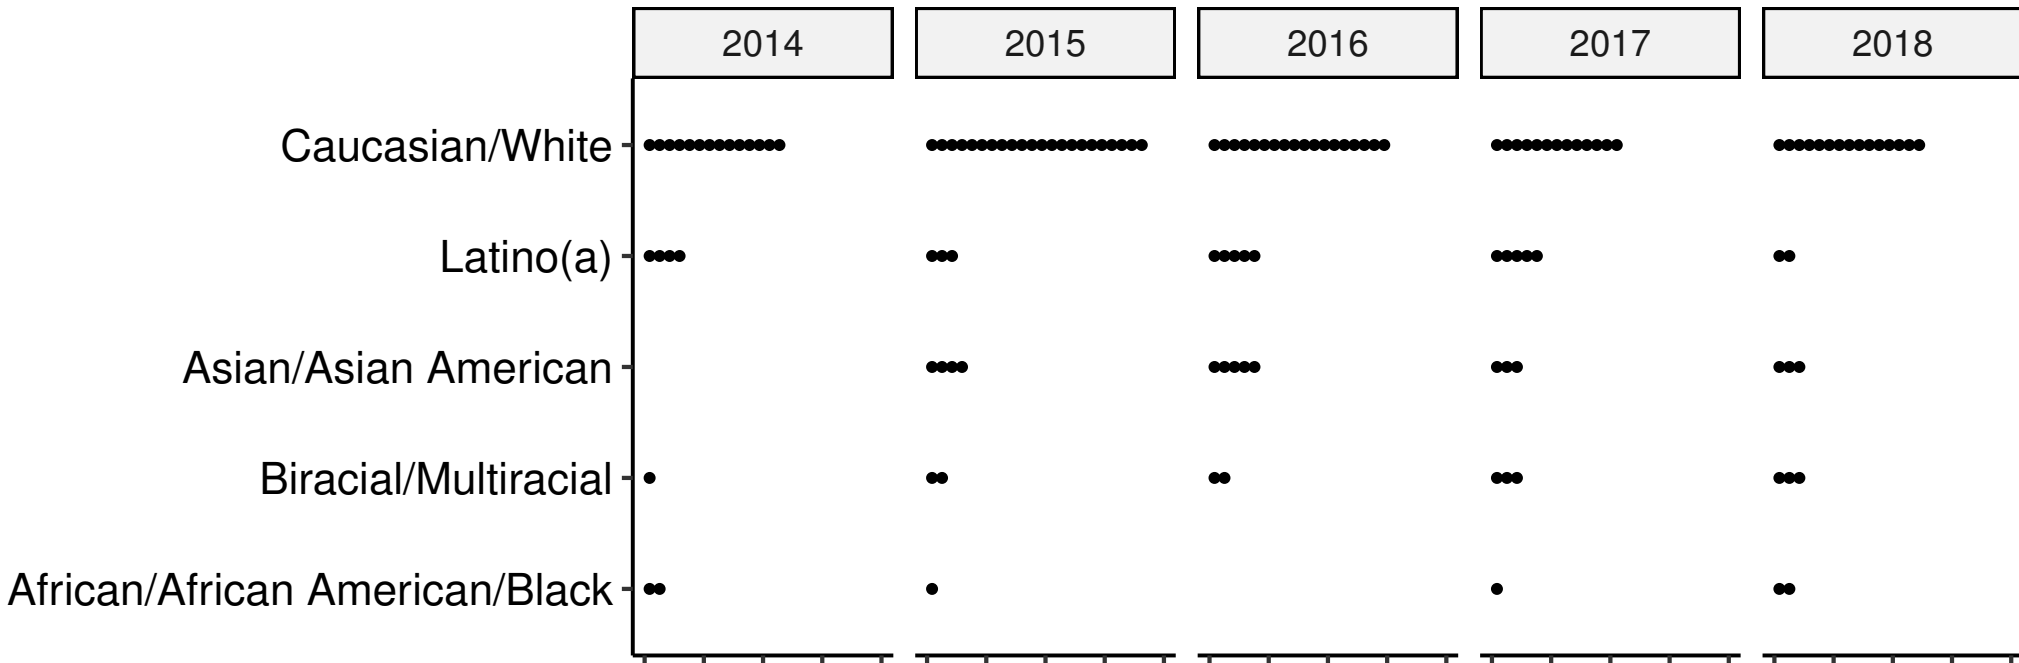

### Attendee Academic Status

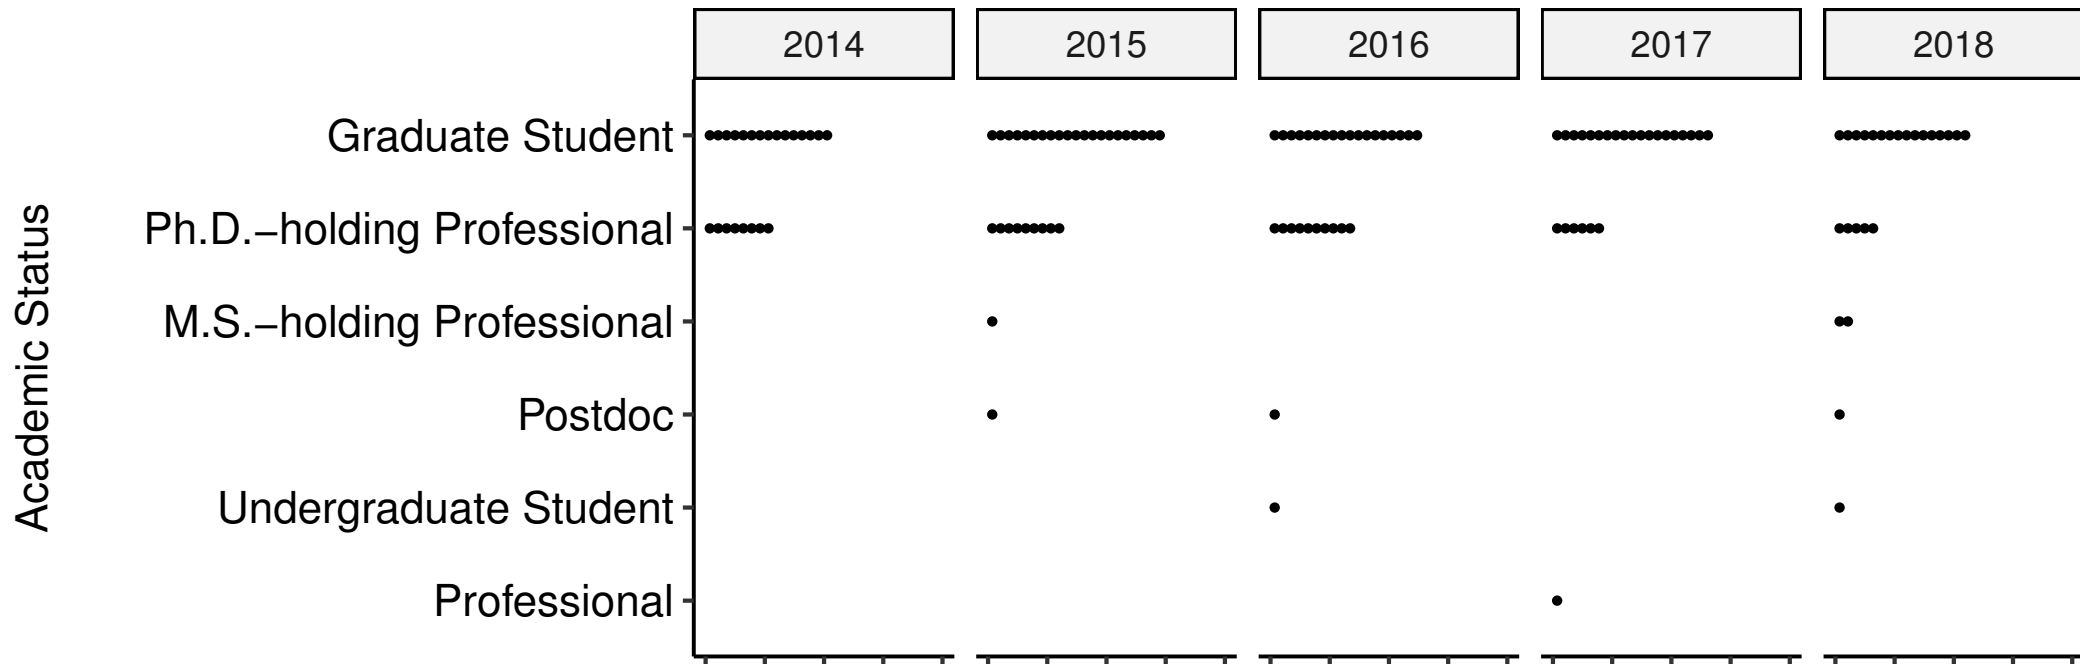



### Overall Rating Post EDAMAME Workshop, 2014 – 2018

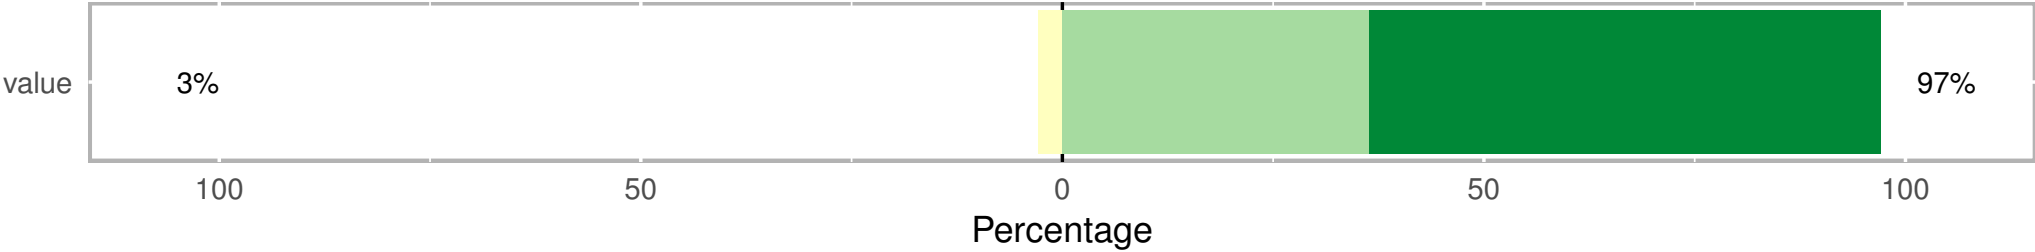

Response  Very poor  Poor  Adequate  Good  Very good

### A. Comfort with Computational Tasks

#### Response

- I do not know what this is.
- Very Uncomfortable
- Uncomfortable
- Comfortable
- Very Comfortable

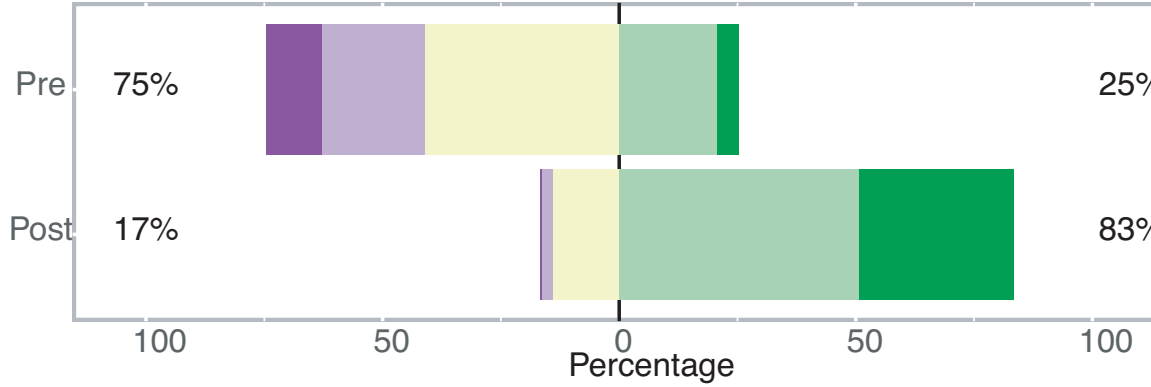

### B. Computational Understanding

- Strongly Disagree
- Disagree
- Agree
- Strongly Agree

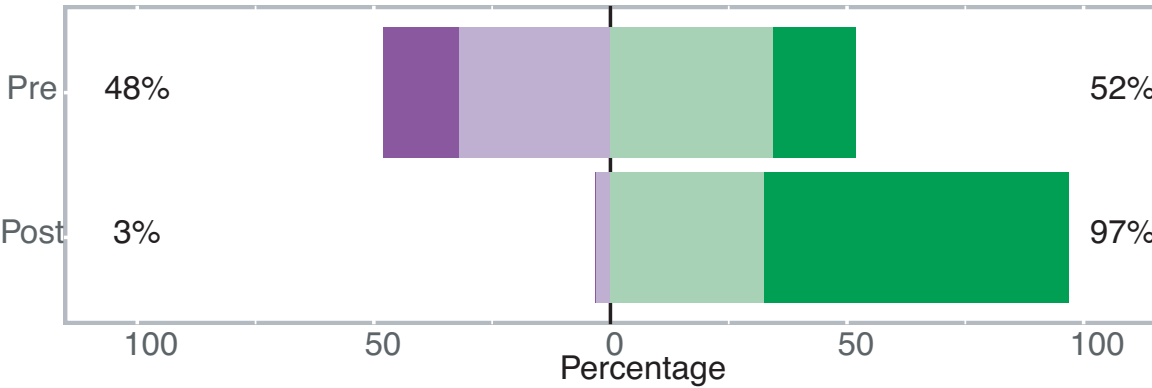

### C. Perception of Computational Ability

- I'm not sure what this is
- No Ability
- Low Ability
- Intermediate Ability
- High Ability

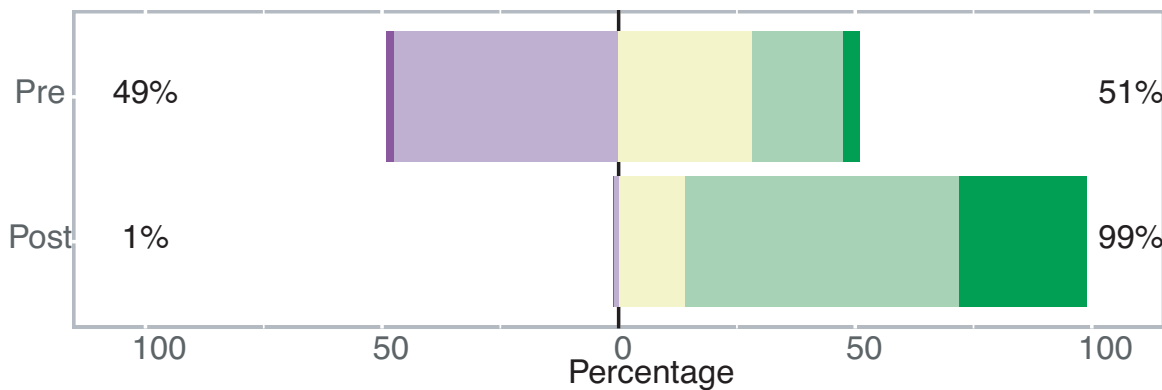

### D. Coding Ability

- Strongly Disagree
- Disagree
- Agree
- Strongly Agree

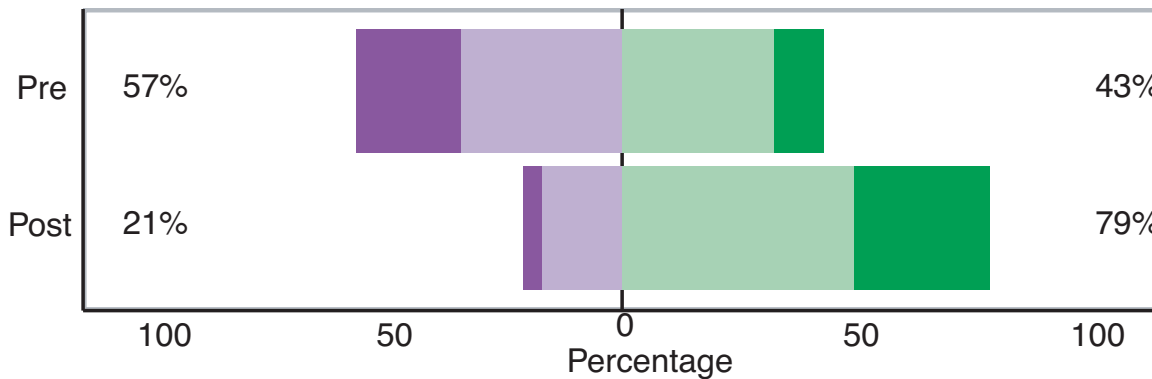

Source: https://www.biorxiv.org/content/10.1101/631267v1.full.pdf
